# Supplementary material for: Sexist, Racist, and Homophobic Violence against Paramedics in a Single Canadian Site
Source: MDPI journal article supplement (doi:10.3390/ijerph21040505), 2024-04-19
Supplement: s1 [file s1]

Save As Draft and Close

Submit and Close

Reporting Section

|                                                                                                  |  |                                                                                                                                 |                     |                                                                                         |
|--------------------------------------------------------------------------------------------------|--|---------------------------------------------------------------------------------------------------------------------------------|---------------------|-----------------------------------------------------------------------------------------|
| To Whom Does This Form Apply:<br><div>-- Select Option --</div>                                  |  | Call Number:                                                                                                                    | Incident Date/Time: | Incident Type:<br><div>Select All That Apply</div> <div>-- Select Option(s) --</div>    |
| Identify Source:<br><div>Select All That Apply</div> <div>-- Select Option(s) --</div>           |  | Please specify other source:                                                                                                    |                     | Circumstances:<br><div>Select All That Apply</div> <div>-- Select Option(s) --</div>    |
| Location of Incident:<br><div>Select All That Apply</div> <div>-- Select all that apply --</div> |  | At this time are you emotionally impacted as a result of the incident:<br><div>Yes</div> <div>No</div> <div>I'm Uncertain</div> |                     | Were you physically harmed as a result of the incident:<br><div>Yes</div> <div>No</div> |

What happened? Please be specific and detailed.

Due to privacy concerns please do not include any of your own personal Medical Information

|                                                                                                          |                                                                          |                                                                                                      |                                                                                                            |                                                                                        |                         |
|----------------------------------------------------------------------------------------------------------|--------------------------------------------------------------------------|------------------------------------------------------------------------------------------------------|------------------------------------------------------------------------------------------------------------|----------------------------------------------------------------------------------------|-------------------------|
| Was a hazard flag communicated by CACC:<br><div>Yes</div> <div>No</div>                                  |                                                                          | Do you recommend the creation of a hazard flag for violent behavior:<br><div>Yes</div> <div>No</div> |                                                                                                            | Confirm criteria is met for creation of a hazard flag:<br><div>Yes</div> <div>No</div> |                         |
| Did police attend the call:<br><div>Yes</div> <div>No</div>                                              | Did you request Police? :<br><div>Yes</div> <div>No</div> <div>N/A</div> | Did you activate a 10-2000 :<br><div>Yes</div> <div>No</div> <div>N/A</div>                          | Police badge number(s) :                                                                                   | Was Police Response Helpful:<br><div>Yes</div> <div>No</div>                           | Describe what they did: |
| Was a Superintendent involved at any time during or following call?<br><div>-- Select Option(s) --</div> |                                                                          |                                                                                                      | Would you like a Superintendent to follow up with you about this incident:<br><div>Yes</div> <div>No</div> |                                                                                        |                         |

Call Specifications

|                                                          |                 |                                                         |                                                      |                                                        |                  |
|----------------------------------------------------------|-----------------|---------------------------------------------------------|------------------------------------------------------|--------------------------------------------------------|------------------|
| Service Name:<br><div>-- Select Option --</div>          |                 | Call Date:                                              |                                                      |                                                        |                  |
| Vehicle Number:<br><div>-- Select Option --</div>        | UTM Code:       |                                                         | Dispatch Priority:<br><div>-- Select Option --</div> | Return Priority:<br><div>-- Select Option --</div>     |                  |
| Pickup Location:                                         | Patient's Name: |                                                         | Patient's Address:                                   |                                                        | Chief Complaint: |
| Dispatch Problem Code:<br><div>-- Select Option --</div> |                 | Primary Problem Code:<br><div>-- Select Option --</div> |                                                      | Interventions:<br><div>-- Select Option(s) --</div>    |                  |
| Crew List:<br><div>-- Select Option(s) --</div>          |                 | Report Creator:<br><div>-- Select Option --</div>       |                                                      | Report Creator Role:<br><div>-- Select Option --</div> |                  |
| Call Received:                                           | Crew Notified:  |                                                         | Crew Mobile:                                         | Arrive Scene:                                          | Depart Scene:    |
| Arrive Destination:                                      |                 | Date Report Completed:                                  |                                                      | Depart Destination:                                    | Arrive Base:     |

Opt-Out of Research

☐ I do not want this form used for research purposes

?

Superintendent Review Section - Management Use Only

☐ Significant Incident

?

|                                                                                             |                                                                                                                                                    |                                                                                                                                   |                                                               |
|---------------------------------------------------------------------------------------------|----------------------------------------------------------------------------------------------------------------------------------------------------|-----------------------------------------------------------------------------------------------------------------------------------|---------------------------------------------------------------|
| Incident Entered in RAIDR:<br><div>Yes</div> <div>No</div>                                  | Was a hazard flag created or extended for this call location:<br>For guidance, please refer to OHSA section 32.0.5<br><div>Yes</div> <div>No</div> | If NO new hazard flag created or extended, why not?<br><div>Non-Residential</div> <div>Flag Already Exists</div> <div>Other</div> | Please specify reason for not creating/extending hazard flag: |
| Notes<br>Ex. If Paramedic requested Superintendent follow up, please detail follow up plan. |                                                                                                                                                    |                                                                                                                                   |                                                               |
| Superintendent:<br><div>-- Select Option --</div>                                           | Superintendent will follow up:<br><div>Yes</div> <div>No</div>                                                                                     |                                                                                                                                   | <input type="checkbox"/> Follow Up/Completion pending:        |

Save As Draft and Close

Submit and Close
